# Supplementary material
Source: Springer Nature journal article supplement (https://www.springermedizin.de/resource/supplementary/12879_2011_1886_MOESM4_ESM.pdf/9443922)
Supplement: MOESM4 [file 9443922]

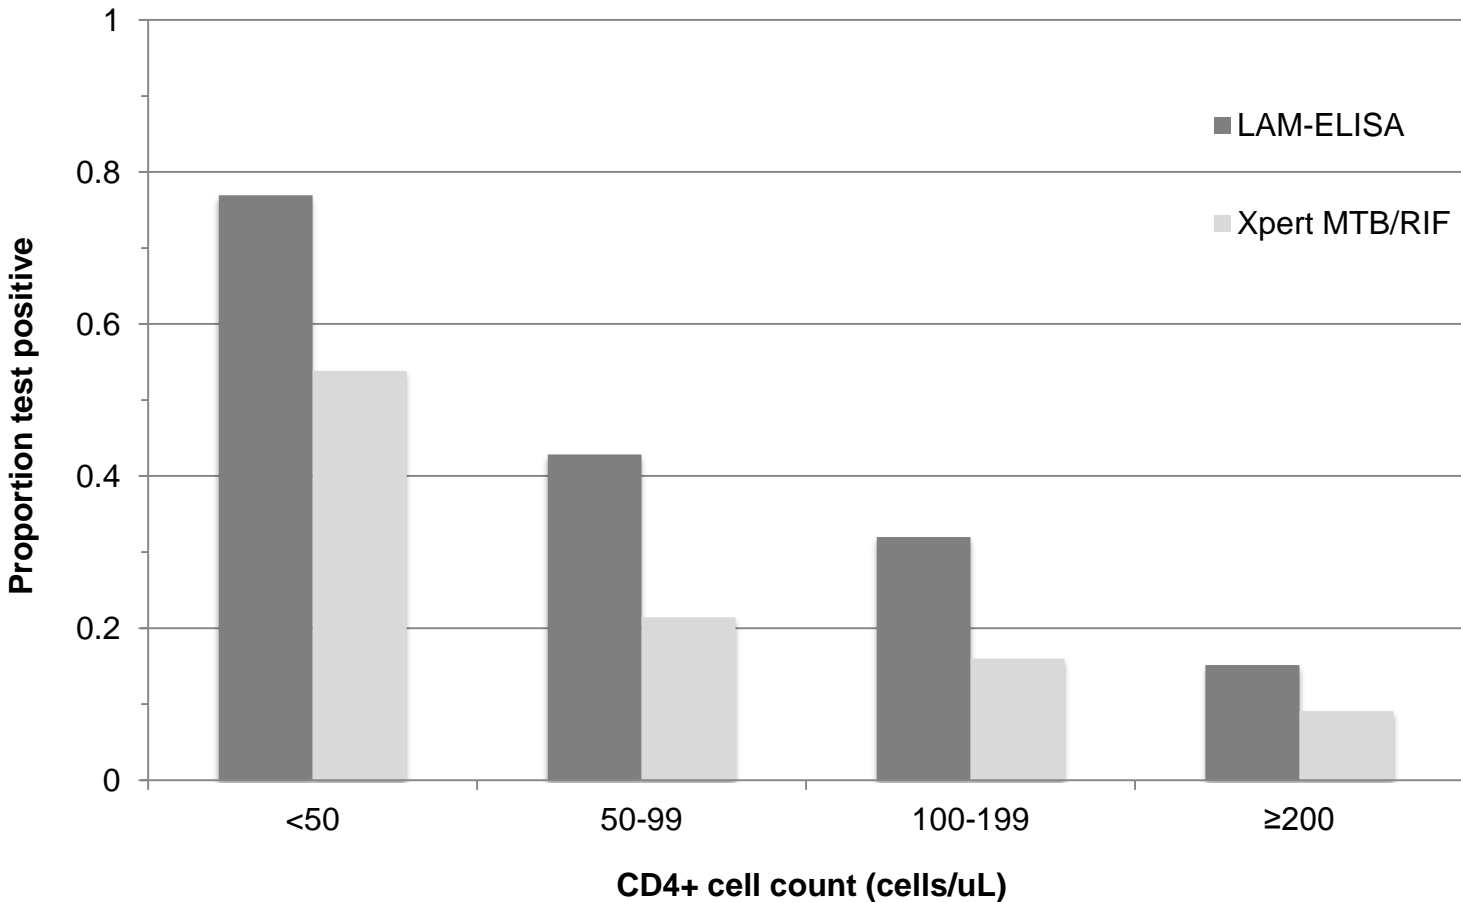

Logistic Regression model for LAM results by CD4 Categories (n=85)

| CD4 Categories  | OR   | 95% CI    | P-values |
|-----------------|------|-----------|----------|
| <50 (reference) | 1    | NA        | NA       |
| 50-99           | 0.33 | 0.07-1.62 | 0.174    |
| 100-199         | 0.21 | 0.05-0.89 | 0.034    |
| ≥200            | 0.08 | 0.02-0.36 | 0.001    |
